# Supplementary material for: Mitochondrial Genome Analysis Reveals Historical Lineages in Yellowstone Bison
Source: PLoS One. 2016 Nov 23;11(11):e0166081. doi: 10.1371/journal.pone.0166081 (PMC5120810; doi:10.1371/journal.pone.0166081)
Supplement: S1 Table — A breakdown of the most common variant of each of the 120 polymorphic sites in bison and the list of haplotypes that differ from it. Non-synonymous mutations are in red, synonymous mutations in green and non-coding tRNA or rRNA regions in black. The two hypothesized IMOP mutations are highlighted in yellow. (XLSX) [file pone.0166081.s002.xlsx]

## Sheet: S1
Base Position	Gene	Consensus Codon/Base	Amino acid	Alternate Codon/Base	Alternate Amino Acid	Haplotypes with Alternate Codon/Base
18	tRNA-Phe	C		T		S9
54	tRNA-Phe	C		T		S9
93	12S rRNA	T		C		wHap15
130	12S rRNA	C		T		S9
520	12S rRNA	A		T		EINP2
533	12S rRNA	T		G		EINP2
534	12S rRNA	A		T		EINP2
851	12S rRNA	C		T		EINP4
940	12S rRNA	C		T		bHap3/bHap12
1157	16S rRNA	C		T		S9
1161	16S rRNA	A		G		wHap15
1606	16S rRNA	C		T		S9
1609	16S rRNA	A		C		S9
1624	16S rRNA	G		A		S9
1715	16S rRNA	G		A		EINP1, EINP3
2206	16S rRNA	T		C		S6
2226	16S rRNA	C		T		wHap15
2688	tRNA-Leu	G		A		bHap11
2939	ND1	GCC	ala	ACC	thr	EINP3
3019	ND1	CCT	pro	CCG	pro	YNPHap1, YNPHap3, CCSP1, S6, S9, Templeton, bHap3/bHap12, bHap4, bHap6, bHap13/bHap16, wHap15
3019	ND1	CCT	pro	CCA	pro	bHap7
3543	ND1	TCA	ser	TTA	leu	EINP2, EINP3, wHap14
3708	tRNA-Ile	A		C		YNPHap8
4042	ND2	AAC	asn	ACC	thr	Templeton
4048	ND2	AAC	asn	ACC	thr	Templeton
4053	ND2	CGA	arg	GGA	gly	Templeton
4994	tRNA-Trp	C		T		YNPHap8
5012	tRNA-Trp	C		A		YNPHap8
5032	tRNA-Ala	C		T		YNPHap8, EINP4
5099	tRNA-Asn	C		T		EINP4
5242	tRNA-Cys	C		T		YNPHap8
5366	COX1	GAT	asp	GAC	asp	YNPHap2, YNPHap5, YNPHap6, bHap2, bHap8, bHap10, bHap11, bHap17
5852	COX1	ATA	ile	ATG	met	YNPHap2, YNPHap5, YNPHap6, bHap2, bHap8, bHap10, bHap11, bHap17
5865	COX1	ACC	thr	CCC	pro	Templeton
5909	COX1	TTA	leu	TTC	phe	Templeton
6692	COX1	ATG	met	ATA	ile	EINP4
6701	COX1	TTC	phe	TTT	phe	EINP4
6704	COX1	ATT	ile	ATC	ile	EINP4
6722	COX1	ATG	met	ATA	ile	EINP4
6728	COX1	ATA	ile	ATG	met	YNPHap8
6737	COX1	ATC	ile	ATT	ile	YNPHap8, EINP4
6752	COX1	TTT	phe	TTC	phe	EINP4
6922	tRNA-Ser	T		A		YNPHap8
6935	tRNA-Ser	C		nothing		bHap3/bHap12
6936	tRNA-Ser	T		nothing		bHap3/bHap12
7008	tRNA-Asp	C		T		YNPHap8
7040	COX2	TTC	phe	TTT	phe	YNPHap8
7049	COX2	GCT	ala	GCA	ala	YNPHap8, EINP3, EINP4
7109	COX2	TTC	phe	TTT	phe	EINP3
7139	COX2	ATC	ile	ATT	ile	YNPHap8
7161	COX2	CTG	leu	TTA	leu	YNPHap8
7214	COX2	ATT	ile	ATC	ile	YNPHap1, YNPHap3, CCSP1, S9, Templeton, bHap4, bHap6, bHap13/bHap16
7355	COX2	GAG	glu	GAA	glu	YNPHap8
7376	COX2	TAC	tyr	TAT	tyr	YNPHap8
7637	COX2	CCC	pro	CCT	pro	EINP4
7661	COX2	CTG	leu	CTA	leu	EINP4
7685	COX2	GCG	ala	GCA	ala	EINP3, EINP4
7750	tRNA-Lys	A		T		EINP4
7768	tRNA-Lys	C		T		EINP4
7876	ATP8	AAT	asn	AAC	asn	YNPHap1, YNPHap3, CCSP1, S6, S9, Templeton, bHap3/bHap12, bHap4, bHap6, bHap7, bHap13/bHap16, wHap15
7880	ATP8	GAA	glu	AAA	lys	bHap3/bHap12
8108	ATP6	ATC	ile	AAC	asn	YNPHap2, YNPHap5, YNPHap6, bHap2, bHap8, bHap10, bHap11, bHap17
8430	ATP6	GGA	gly	GGG	gly	bHap3/bHap12
8458	ATP6	GCT	ala	ACT	thr	CCSP1, bHap13/bHap16, wHap15
8504	ATP6	ACA	thr	ATA	ile	YNPHap2, YNPHap5, YNPHap6, bHap2, bHap8, bHap10, bHap11, bHap17
8624	COX3	ACT	thr	ACC	thr	YNPHap8
8935	COX3	ACT	thr	ATT	ile	S9
9001	COX3	CTG	leu	CAG	gln	YNPHap5, YNPHap7
9002	COX3	CTG	leu	CTA	leu	YNPHap1, YNPHap3, S9, Templeton
9015	COX3	GTC	val	CTC	leu	YNPHap5
9015	COX3	GTC	val	ATC	ile	YNPHap7
9114	COX3	TTA	leu	CTA	leu	bHap4
9176	COX3	TCC	ser	TCA	ser	EINP2
9224	COX3	GGC	gly	GGG	gly	bHap17
9252	COX3	TTA	leu	CTA	leu	EINP4
9266	COX3	TTT	phe	TTC	phe	every haplotype in Douglas et al. 2010
9290	COX3	TTC	phe	TTT	phe	EINP4
9434	tRNA-Gly	C		T		EINP3
9448	tRNA-Gly	G		A		EINP3
9582	ND3	GGA	gly	GGG	gly	S6
9627	ND3	TTC	phe	TTT	phe	S9
9648	ND3	TTC	phe	TTT	phe	S9
9723	ND3	ATG	met	ATA	ile	S6
9795	ND3	CTG	leu	CTA	leu	EINP4
9827	tRNA-Arg	T		C		EINP4
9842	tRNA-Arg	C		T		EINP4
9856	tRNA-Arg	G		A		EINP4
10431	ND4	AAC	asn	ATC	ile	bHap4
10453	ND4	TTC	phe	TTT	phe	YNPHap8
10470	ND4	TTA	leu	TCA	ser	bHap6
10525	ND4	TAT	tyr	TAC	tyr	bHap3/bHap12
10678	ND4	ATA	ile	ATG	met	YNPHap2, YNPHap5, YNPHap6, bHap2, bHap8, bHap10, bHap11, bHap17
10921	ND4	AAC	asn	AAT	asn	YNPHap2, YNPHap5, YNPHap6, bHap2, bHap17
11108	ND4	GCT	ala	ACT	thr	YNPHap2, YNPHap5, YNPHap6, bHap2, bHap8, bHap10, bHap11, bHap17
11359	ND4	GGA	gly	GGG	gly	S6
11406	ND4	ATA	ile	ACA	thr	EINP4, bHap5
11483	ND4	CTG	leu	TTG	leu	YNPHap2, YNPHap5, YNPHap6, bHap2, bHap17
11492	ND4	TTA	leu	ATA	ile	EINP4, bHap5, bHap9
11507	ND4	TTA	leu	CTA	leu	bHap6
11718	tRNA-Leu	G		A		YNPHap8
12107	ND5	TAC	tyr	TAT	tyr	YNPHap2, YNPHap5, YNPHap6, bHap2, bHap8, bHap10, bHap11, bHap17
12159	ND5	TTC	phe	CTC	leu	bHap8
12222	ND5	TAC	tyr	CAC	his	YNPHap2, YNPHap5, YNPHap6, bHap2, bHap8, bHap10, bHap11, bHap17
12840	ND5	GCC	ala	ACC	thr	bHap7
13292	ND5	TAC	tyr	TAT	tyr	EINP2, EINP3, wHap14
13573	ND6	ATA	ile	ATG	met	EINP4
13594	ND6	TTT	phe	TTA	leu	EINP4
13624	ND6	TGA	trp	TGG	trp	EINP4
13682	ND6	TCC	ser	TTC	phe	S6
13699	ND6	ATT	ile	ATC	ile	YNPHap3, YNPHap6
13707	ND6	TGG	trp	CGG	arg	YNPHap3, YNPHap6
13810	ND6	TTA	leu	TTT	phe	Templeton
14026	ND6	GTA	val	GTG	val	EINP4, bHap5, bHap9
14160	CYTB	AAC	asn	AGC	ser	bHap7
14445	CYTB	GTA	val	GCA	ala	YNPHap2, YNPHap5, YNPHap6, bHap8, bHap10, bHap11, bHap17
14519	CYTB	GTA	val	ATA	ile	EINP2, EINP3, wHap14
14527	CYTB	GCC	ala	GCT	ala	CCSP1, bHap13/bHap16
14914	CYTB	GAT	asp	GAC	asp	EINP4, bHap5, bHap9
14935	CYTB	CCA	pro	CCG	pro	bHap6
15100	CYTB	ATT	ile	ATC	ile	EINP3
15195	CYTB	ATC	ile	ACC	thr	EINP3
15344	tRNA-Thr	A		G		YNPHap3, S9, Templeton
