# Supplementary material for: Mitochondrial Genome Analysis Reveals Historical Lineages in Yellowstone Bison
Source: PLoS One. 2016 Nov 23;11(11):e0166081. doi: 10.1371/journal.pone.0166081 (PMC5120810; doi:10.1371/journal.pone.0166081)
Supplement: S2 Table — Sample IDs and relating haplotypes for 25 modern Yellowstone NP bison from the study. (XLSX) [file pone.0166081.s003.xlsx]

## Sheet: Sheet1
Yellowstone Animal ID	TAMU ID	YNPHap	Gender	Age	Life history strategy (based on telemetry study)	Sampling Location
YNP1586/99-088	13657	bHap17	F	6	Central year-round	Madison Valley
Ear Tag #80	2011002044	Templeton	M	5	Unknown (not included on map)	Gardiner Basin
3225	2012002859	YNPHap1	F	13+	Central year-round	Hayden Valley
Yell-047	2012002869	YNPHap1	F	10+	Northern year-round	Lamar Valley
Yell-056	2012002871	YNPHap1	F	9+	Northern year-round	Lamar Valley
Yell-358	2012002877	YNPHap1	F	5	Central winter migrant	Madison Valley
Yell-360	2012002878	YNPHap1	F	5	Northern year-round	Blacktail Deer Plateau
Yell-370	2012002884	YNPHap1	F	5	Central winter migrant	Old Faithful Basin
Yell-371	2012002885	YNPHap1	F	5	Northern year-round	Lamar Valley
WG091210-004	2009005885	YNPHap2	F	adult	Unknown (not included on map)	Gardiner Basin
WG091210-018	2009005899	YNPHap2	F	calf	Unknown (not included on map)	Gardiner Basin
Yell-017	2012002860	YNPHap2	F	13+	Central year-round	Pelican Creek
Yell-020	2012002861	YNPHap2	F	9	Northern emigrant from Central	Blacktail Deer Plateau
Yell-033	2012002864	YNPHap2	F	10	Northern emigrant from Central	Lamar Valley
Yell-036	2012002865	YNPHap2	F	12+	Central year-round	Old Faithful Basin
Yell-050	2012002870	YNPHap2	F	9	Northern year-round	Lamar Valley
Yell-066	2012002873	YNPHap2	F	4	Central year-round	Hayden Valley
Yell-067	2012002874	YNPHap2	F	2	Central migrant	Gardiner Basin
Yell-301	2012002876	YNPHap2	F	10	Northern emigrant from Central	Blacktail Deer Plateau
Yell-070	2012002875	YNPHap3	F	3	Central year-round	Old Faithful Basin
Yell-029	2012002862	YNPHap4	F	9	Northern emigrant from Central	Lamar Valley
Yell-031	2012002863	YNPHap5	F	13+	Northern emigrant from Central	Lamar Valley
Yell-040	2012002867	YNPHap6	F	7	Central winter migrant	Old Faithful Basin
Yell-362	2012002880	YNPHap7	F	5	Northern year-round	Lamar Valley
YNP1861	13932	YNPHap8	F	calf	Central year-round	Hayden Valley
