# Supplementary material for: Mitochondrial Genome Analysis Reveals Historical Lineages in Yellowstone Bison
Source: PLoS One. 2016 Nov 23;11(11):e0166081. doi: 10.1371/journal.pone.0166081 (PMC5120810; doi:10.1371/journal.pone.0166081)
Supplement: S3 Table — (XLSX) [file pone.0166081.s004.xlsx]

## Sheet: Sheet1
Haplotype	GenBank Accession Number
YNPHap1	KX451352
YNPHap2	KX451353
YNPHap3	KX451354
YNPHap4	KX451355
YNPHap5	KX451356
YNPHap6	KX451357
YNPHap7	KX451358
YNPHap8	KX451359
CCSP	KX451360
EINP1	KX451361
EINP2	KX451362
EINP3	KX451363
EINP4	KX451364
S6	KX451365
S9	KX451366
Templeton	KX451367
